# Supplementary material
Source: PubMed Central journal article supplement (PMC7132622)
Supplement: mmc1.pdf [file mmc1.pdf]

YMTHE, Volume 28

## **Supplemental Information**

### **HucMSC-Derived Exosomes Mitigate the Age-Related Retardation of Fertility in Female Mice**

**Weijie Yang, Jing Zhang, Boqun Xu, Yuanlin He, Wei Liu, Jiazhao Li, Songying Zhang, Xiaona Lin, Dongming Su, Tinghe Wu, and Jing Li**

1 **Supplementary Figure Legend**

2 **Figure S1. Specific effects of HucMSC-exos on follicular activation and**

3 **development.** (A) Western blot showing the expressions of p-Akt (Ser473), p-mTOR

4 (Ser2448), p-rpS6 (Ser235/236) in ovaries treated with or without HucMSC-exos for

5 24 h. Ovaries co-cultured with HucMSC were used as positive control. The

6 expressions of Akt, mTOR, rpS6, and  $\beta$ -actin were used as internal controls. Ctrl,

7 PBS; Exo, HucMSC-exos 20  $\mu$ g/mL; MSC, HucMSC. (B) Western blot of the

8 expression of p-Akt (Ser473), p-mTOR (Ser2448), p-rpS6 (Ser235/236) in isolated

9 primordial oocytes treated with HucMSC-exos with/without Akt inhibitor, Akt VIII

10 (AI) and mTOR inhibitor, rapamycin (Ra) for 24 h. (C and D) Blocking effects of

11 mTOR knockdown on HucMSC-exos induced activation of PI3K/mTOR signaling

12 pathway. Newborn ovaries were pretreated with mTOR siRNAs for 60 h, following

13 with 24 h of treatment with or without HucMSC-exos. RT-PCR showing the effective

14 knockdown of mTOR mRNAs (C); Western blot showing the decreased expression of

15 p-Akt (Ser473), mTOR and p-mTOR (Ser2448), p-rpS6 (Ser235/236) in treated

16 newborn ovaries (D). The expressions of Akt, rpS6, and  $\beta$ -actin were used as internal

17 controls. siNC, control siRNA; siNC+E, control siRNA+HucMSC-exos; siM, mTOR

18 siRNAs; siM+E, mTOR siRNAs+HucMSC-exos. (E) TUNEL assay of apoptosis in

19 ovaries treated with or without HucMSC-exos. Paired ovaries were separated and

20 treated with or without HucMSC-exos for 24 h and transplanted under kidney

21 capsules of the same recipient mice. Ovaries were collected 48 h after transplantation.

22 Green, TUNEL positive cells; Blue, nuclear staining with Hoechst 33342. Bar=20

23  $\mu$ m. (F) Ovarian PCNA staining in nuclei of oocytes and granulosa cells. Bar=50  $\mu$ m.

24 **Figure S2. Histology of follicular development between paired ovaries treated**

25 **with or without HucMSC-exos.** Mice at 10 month of age were intra-bursa injected

26 with 20  $\mu$ L HucMSC-exos in one lateral ovary and same volume of PBS in the other

27 lateral ovary. Paired ovaries were collected 3 weeks later for morphological analysis.

28 Representative three pairs of ovaries were shown. In each group, right panels are

29 magnifications of left panels. Bar=50 $\mu$ m.

30

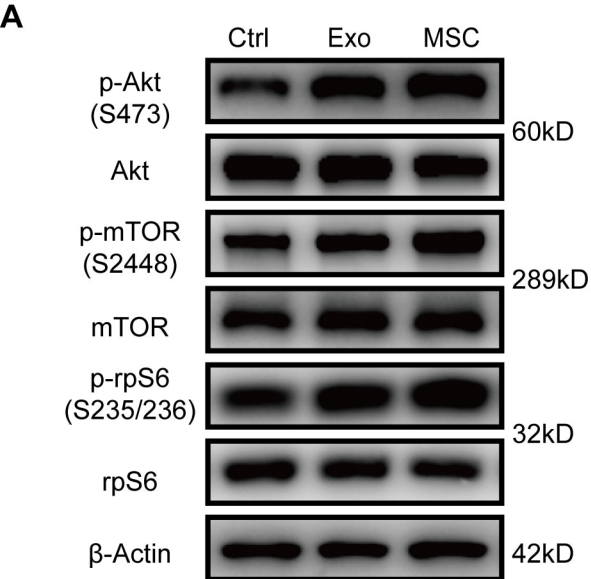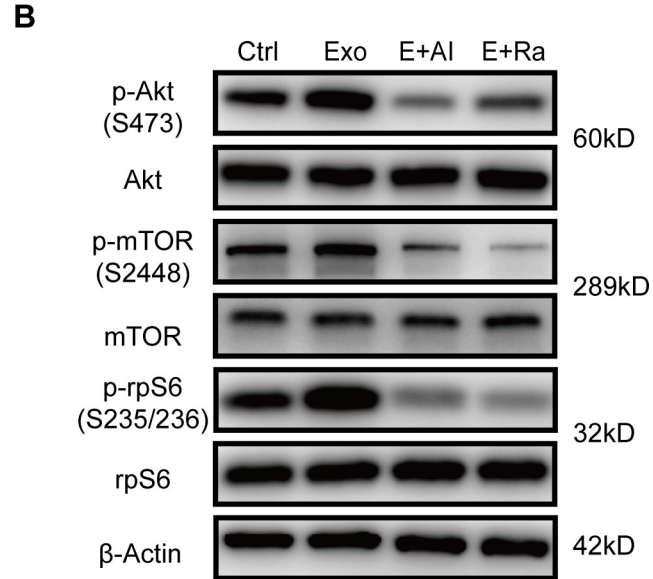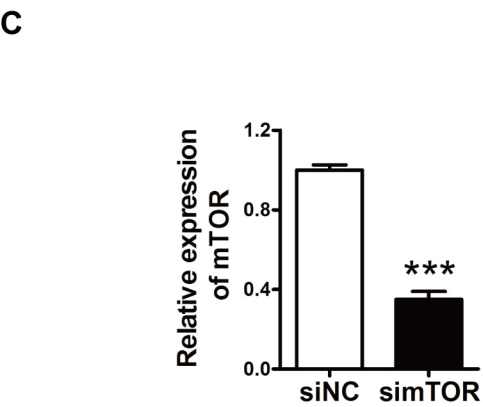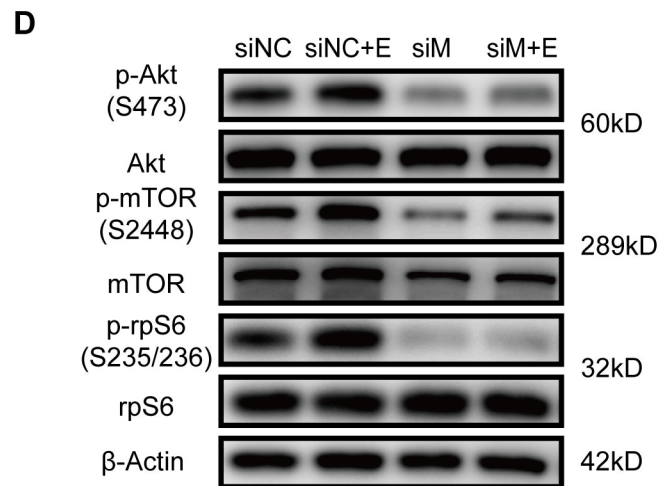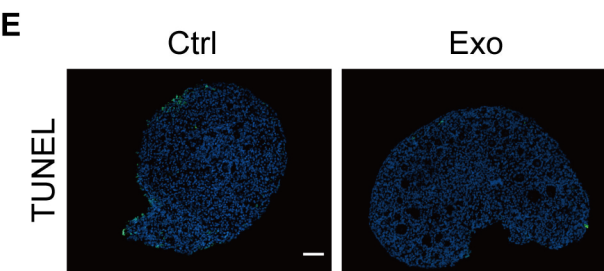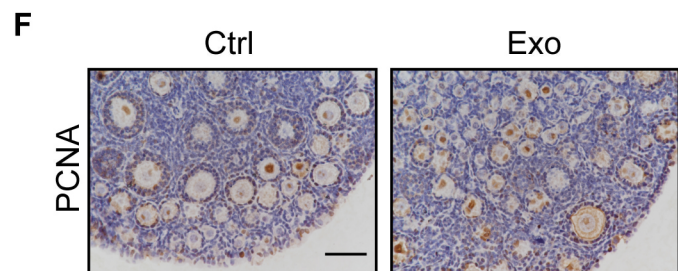

Ctrl

Magnified

Exo

Magnified

1

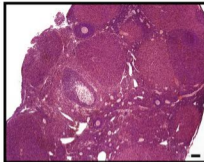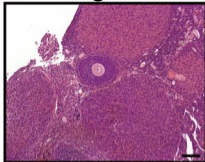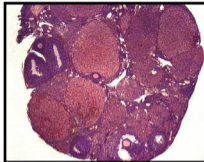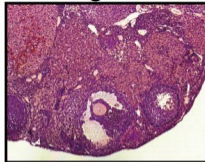

2

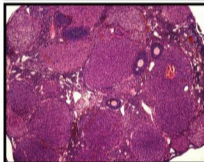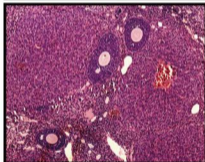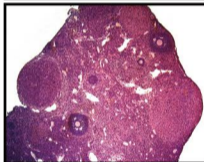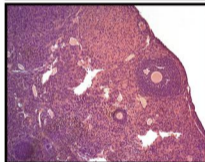

3

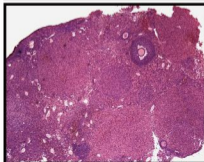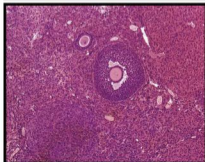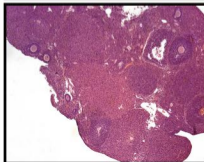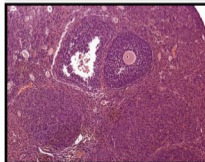

**Supplementary Table S1**

| Antibody                          | Company     | Catalog Number | Dilution                     |
|-----------------------------------|-------------|----------------|------------------------------|
| PE-conjugatedCD11b Antibody       | BD          | 561689         | 1 test/10 <sup>6</sup> cells |
| FITC-conjugatedCD19 Antibody      | BD          | 560994         | 1 test/10 <sup>6</sup> cells |
| FITC-conjugatedCD34 Antibody      | BD          | 560942         | 1 test/10 <sup>6</sup> cells |
| FITC-conjugatedCD44 Antibody      | BD          | 560977         | 1 test/10 <sup>6</sup> cells |
| FITC-conjugatedCD45 Antibody      | BD          | 560976         | 1 test/10 <sup>6</sup> cells |
| PE-conjugatedCD73 Antibody        | BD          | 561014         | 1 test/10 <sup>6</sup> cells |
| PE-conjugatedCD90 Antibody        | BD          | 561970         | 1 test/10 <sup>6</sup> cells |
| APC-conjugatedCD105 Antibody      | BD          | 562408         | 1 test/10 <sup>6</sup> cells |
| FITC-conjugatedHLA-DR/DQ Antibody | BD          | 555563         | 1 test/10 <sup>6</sup> cells |
| β-Actin Antibody                  | CST         | 3700           | WB 1:2000                    |
| GAPDH Antibody                    | CST         | 5174           | WB 1:2000                    |
| Alix Antibody                     | Proteintech | 12422-1-AP     | WB 1:1000                    |
| Tsg101 Antibody                   | Abclonal    | A2216          | WB 1:1000                    |
| CD9 Antibody                      | Proteintech | 20597-1-AP     | WB 1:1000                    |
| Gm130 Antibody                    | BD          | 610822         | WB 1:1000                    |
| rpS6 Antibody                     | CST         | 2217           | WB 1:1000                    |
| p-rpS6 (S235/236) Antibody        | CST         | 2211           | WB 1:1000                    |
| mTOR Antibody                     | CST         | 2983           | WB 1:1000                    |
| p-mTOR Antibody                   | CST         | 5536           | WB 1:1000                    |
| AKT Antibody                      | CST         | 2920           | WB 1:1000                    |
| p-AKT Antibody                    | CST         | 4060           | WB 1:1000                    |
| Foxo3a Antibody                   | CST         | 12829          | IHC 1:200                    |
| PCNA Antibody                     | CST         | 13110          | IHC 1:1000                   |
| Cx37 Antibody                     | Abcam       | Ab181701       | IF 1:200<br>WB 1:1000        |

**Supplementary Table S2 Real-time PCR Primers**

| Gene         | Forward primer                | Reverse primer              |
|--------------|-------------------------------|-----------------------------|
| <i>Actin</i> | 5'-CCGTAAAGACCTCTATGCC-3'     | 5'-CTCAGTAACAGTCCGCCTA-3'   |
| <i>Gdf9</i>  | 5'-TCTTAGTAGCCTTAGCTCTCAGG-3' | 5'-TGTCAGTCCCATCTACAGGCA-3' |
| <i>Zp3</i>   | 5'-CATCTCAAAGTCGCGCCAG-3'     | 5'-GCCTGCGGTTTCGAGAAAC-3'   |
| <i>Bmp15</i> | 5'-TCCTTGCTGACGACCCTACAT-3'   | 5'-TACCTCAGGGGATAGCCTTGG-3' |
| <i>Amhr</i>  | 5'-GCAGCACAAGTATCCCCAAAC-3'   | 5'-GTCTCGGCATCCTTGCATCTC-3' |
| <i>Kit</i>   | 5'-CTCCCCAACAGTGTATTAC-3'     | 5'-TAGCCCGAAATCGCAAATCTT-3' |
| <i>Kitl</i>  | 5'-GAATCTCCGAAGAGGCCAGAA-3'   | 5'-GCTGCAACAGGGGGTAACAT-3'  |
| <i>Fshr</i>  | 5'-CCTTGCTCCTGGTCTCCTTG-3'    | 5'-CTCGGTCACCTTGCTATCTTG-3' |
| <i>Star</i>  | 5'-ATGTTCTCGCTACGTTCAAG-3'    | 5'-CCCAGTGCTCTCCAGTTGAG-3'  |
